# Supplementary material for: Substrate Stiffness Modulates Renal Progenitor Cell Properties via a ROCK-Mediated Mechanotransduction Mechanism
Source: PubMed Central journal article supplement (PMC6953094; doi:10.3390/cells8121561), 2019-12-03
Supplement: cells-08-01561-s001.pdf [file cells-08-01561-s001.pdf]

|                    | 1<br>Vs<br>0.2 | 2<br>vs<br>1 | 4<br>vs<br>0.2 | 4<br>vs<br>0.5 | 4<br>vs<br>1 | 4<br>vs<br>2 | 8<br>vs<br>0.2 | 8<br>vs<br>0.5 | 8<br>vs<br>1 | 8<br>vs<br>2 | 8<br>vs<br>4 | 12<br>vs<br>0.2 | 12<br>vs<br>0.5 | 12<br>vs<br>1 | 12<br>vs<br>2 | 12<br>vs<br>4 | 25<br>Vs<br>0.2 | 25<br>Vs<br>0.5 | 25<br>vs<br>1 | 25<br>vs<br>2 | 25<br>vs<br>4 | 50<br>Vs<br>0.2 | 50<br>Vs<br>0.5 | 50<br>vs<br>1 | 50<br>vs<br>2 | 50<br>vs<br>4 | 50<br>vs<br>25 |
|--------------------|----------------|--------------|----------------|----------------|--------------|--------------|----------------|----------------|--------------|--------------|--------------|-----------------|-----------------|---------------|---------------|---------------|-----------------|-----------------|---------------|---------------|---------------|-----------------|-----------------|---------------|---------------|---------------|----------------|
| <b>circularity</b> | 1              | 0            | 1              | 1              | 0            | 1            | 1              | 1              | 1            | 1            | 0            | 1               | 1               | 0             | 1             | 0             | 1               | 1               | 1             | 1             | 0             | 1               | 1               | 0             | 0             | 0             | 1              |
| <b>spreading</b>   | 0              | 0            | 1              | 1              | 1            | 1            | 1              | 1              | 1            | 1            | 1            | 1               | 1               | 1             | 1             | 1             | 1               | 1               | 1             | 1             | 1             | 1               | 1               | 1             | 1             | 1             | 0              |
| <b>Axis ratio</b>  | 1              | 1            | 1              | 1              | 0            | 1            | 1              | 1              | 0            | 1            | 0            | 1               | 1               | 0             | 1             | 0             | 1               | 1               | 0             | 1             | 0             | 1               | 0               | 0             | 1             | 0             | 0              |

**Table 1.** Means comparison obtained after ANOVA with post-hoc Tukey test.

1 indicates that the difference of the means is significant at the 0.05 level.

0 indicates that the difference of the means is not significant at the 0.05 level
